# Supplementary material for: Protective effects of S100A8 on sepsis mortality: Links to sepsis risk in obesity and diabetes
Source: PubMed Central journal article supplement — iScience. 2022 Nov 23;25(12):105662. doi: 10.1016/j.isci.2022.105662 (PMC9732389; doi:10.1016/j.isci.2022.105662), 2022-11-23
Supplement: mmc1.pdf [file mmc1.pdf]

## **Supplemental information**

### **Protective effects of S100A8 on sepsis mortality:**

#### **Links to sepsis risk in obesity and diabetes**

**Daisuke Miyashita, Ryota Inoue, Takahiro Tsuno, Tomoko Okuyama, Mayu Kyohara, Chigusa Nakahashi-Oda, Kuniyuki Nishiyama, Setsuko Fukushima, Yutaro Inada, Yu Togashi, Akira Shibuya, Yasuo Terauchi, and Jun Shirakawa**

## Figure S1

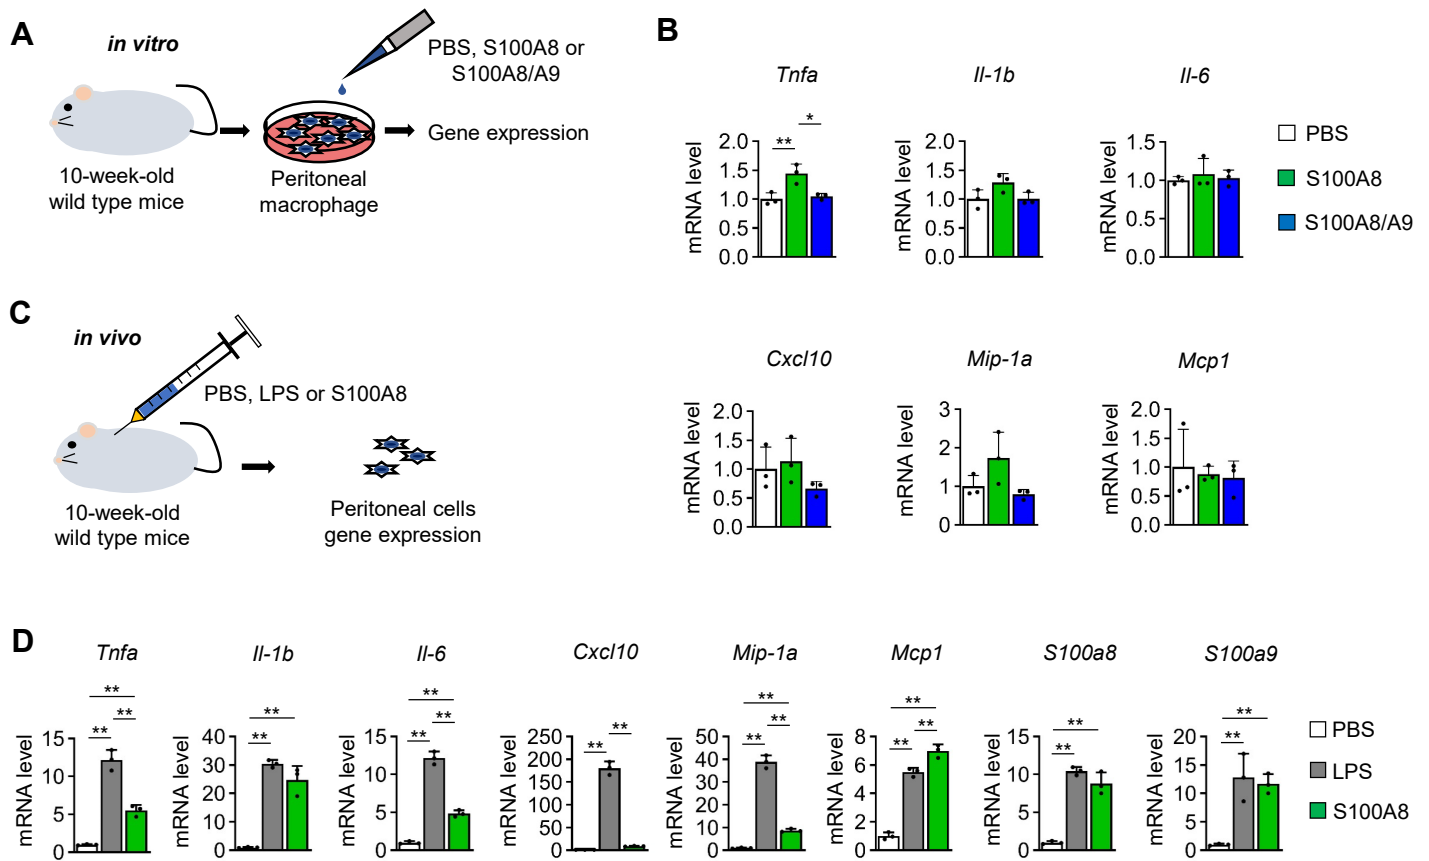

### Figure S1. S100A8 administration upregulated inflammatory cytokine expression in peritoneal macrophages. Related to Figure 1.

Wild-type mice at 10 weeks of age were used for *in vitro* and *in vivo* experiments.

(A) Experimental protocol for an *in vitro* study. Peritoneal macrophages from mice were incubated with PBS, S100A8 (0.3  $\mu\text{g}/\text{mL}$ ), or S100A8/A9 (0.65  $\mu\text{g}/\text{mL}$ ) and analyzed by quantitative PCR at 2 hours.

(B) mRNA expression of the indicated inflammatory cytokine genes in peritoneal macrophages (n = 3).

(C) Experimental protocol for an *in vivo* study. Mice were injected with PBS, LPS (12.5  $\mu\text{g}/\text{gBW}$ ), or S100A8 (0.1  $\mu\text{g}/\text{gBW}$ ), and then peritoneal cells were analyzed by quantitative PCR at 4 hours after injection.

(D) mRNA expression of the indicated inflammatory cytokine and S100 genes in peritoneal cells (n = 3). Data are represented as the mean  $\pm$  SEM. \*p < 0.05, \*\*p < 0.01.

**Figure S2**

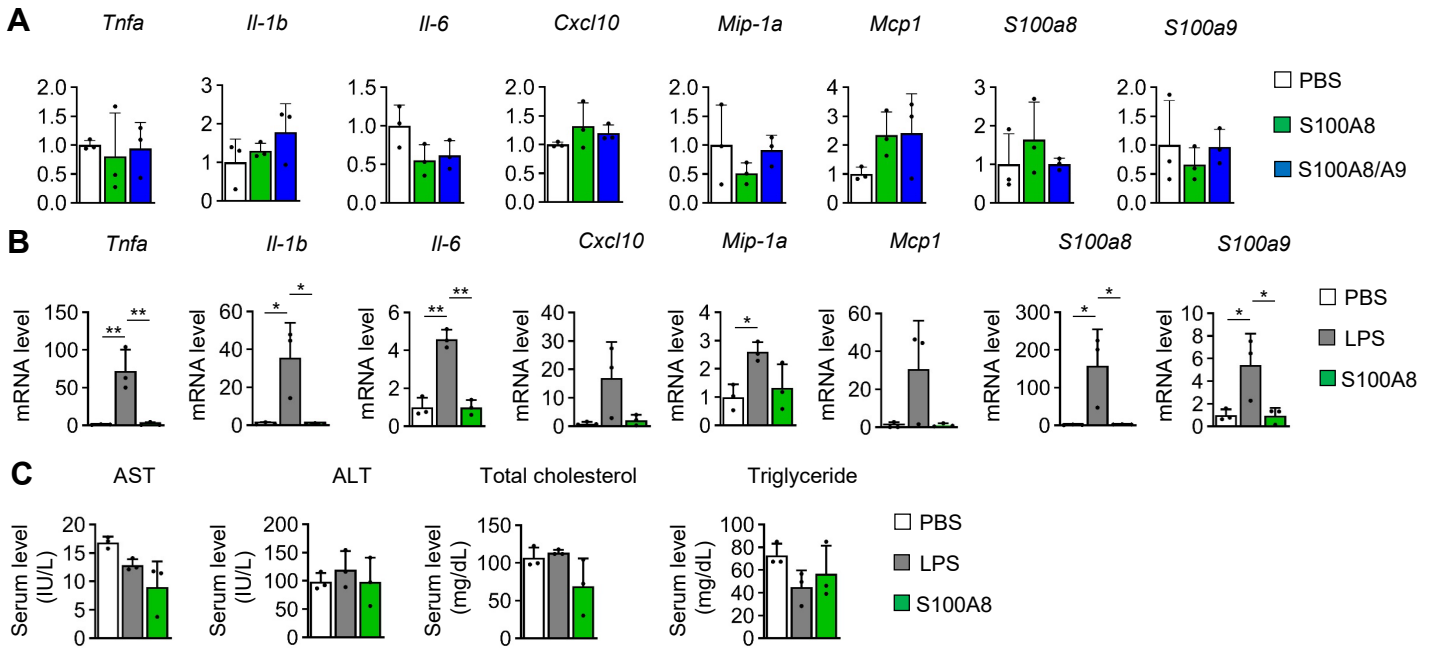

**Figure S2. S100A8 administration did not induce inflammatory response in hepatoma cells. Related to Figure 1.**

(A) mRNA expression of the indicated cytokine genes in Hepa1-6 mouse hepatoma cells incubated with PBS, S100A8 (0.3  $\mu\text{g}/\text{mL}$ ), or S100A8/A9 (0.65  $\mu\text{g}/\text{mL}$ ) for 4 hours ( $n = 3$ ).

(B and C) Wild-type mice were intraperitoneally injected with PBS, LPS (12.5  $\mu\text{g}/\text{gBW}$ ), or S100A8 (0.1  $\mu\text{g}/\text{gBW}$ ).

(B) mRNA expression of the indicated inflammatory cytokine genes in the mouse liver at 4 hours after injection ( $n = 3$ ).

(C) AST, ALT, total cholesterol and triglyceride levels in serum samples collected from mice at 4 hours after injection ( $n = 3$ ).

Data are represented as the mean  $\pm$  SEM. \* $p < 0.05$ , \*\* $p < 0.01$ .

**Figure S3**

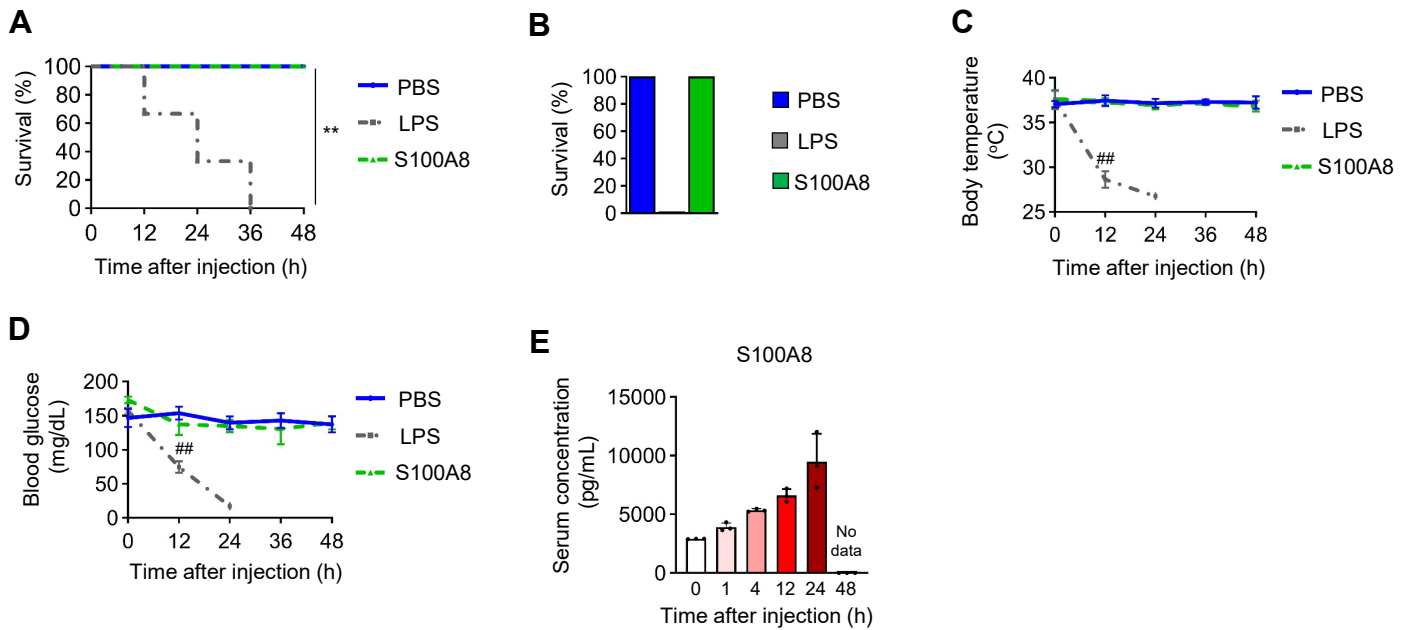

**Figure S3. S100A8 administration did not induce sepsis. Related to Figure 1.**

Wild-type mice at 10 weeks of age were used for experiments.

(A) Survival rates at 12, 24, 36, or 48 hours after PBS, LPS, or S100A8 injection (n = 3).

(B) Survival rates at 72 hours after PBS, LPS, or S100A8 injection (n = 3).

(C and D) Body temperature (C) and blood glucose levels (D) at 12, 24, 36, or 48 hours after PBS, LPS, or S100A8 injection (n = 3).

(E) Serum S100A8 levels at 1, 4, 12, or 24 hours after LPS (12.5  $\mu$ g/gBW) injection. All mice died within 48 hours of LPS injection (n = 3).

Data are represented as the mean  $\pm$  SEM. \*\*p < 0.01; ##p < 0.01 vs. S100A8.

**Figure S4**

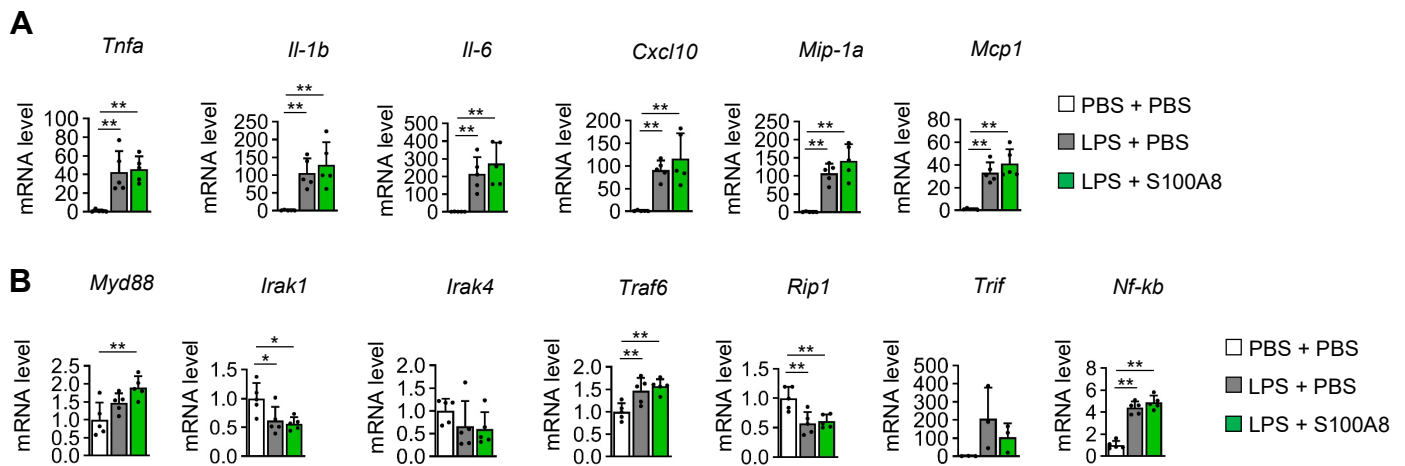

**Figure S4. Administration of S100A8 to peritoneal macrophages *in vitro* after LPS stimulation, fails to suppress LPS-induced upregulation of inflammatory cytokine expressions in peritoneal macrophages. Related to Figure 1.**

Wild-type mice at 10 weeks of age were used for *in vitro* experiments. Peritoneal macrophages from mice were pretreated with LPS (2  $\mu\text{g}/\text{mL}$ ) for 30 minutes before PBS or S100A8 (0.3  $\mu\text{g}/\text{mL}$ ) supplementation for 2 hours and analyzed by quantitative PCR.

(A) mRNA expression of the indicated inflammatory cytokine genes in peritoneal macrophages (n = 5).  
(B) mRNA expression of the indicated TLR4 signaling pathway-related genes in peritoneal macrophages (n = 5).

Data are represented as the mean  $\pm$  SEM. \*p < 0.05, \*\*p < 0.01.

**Figure S5**

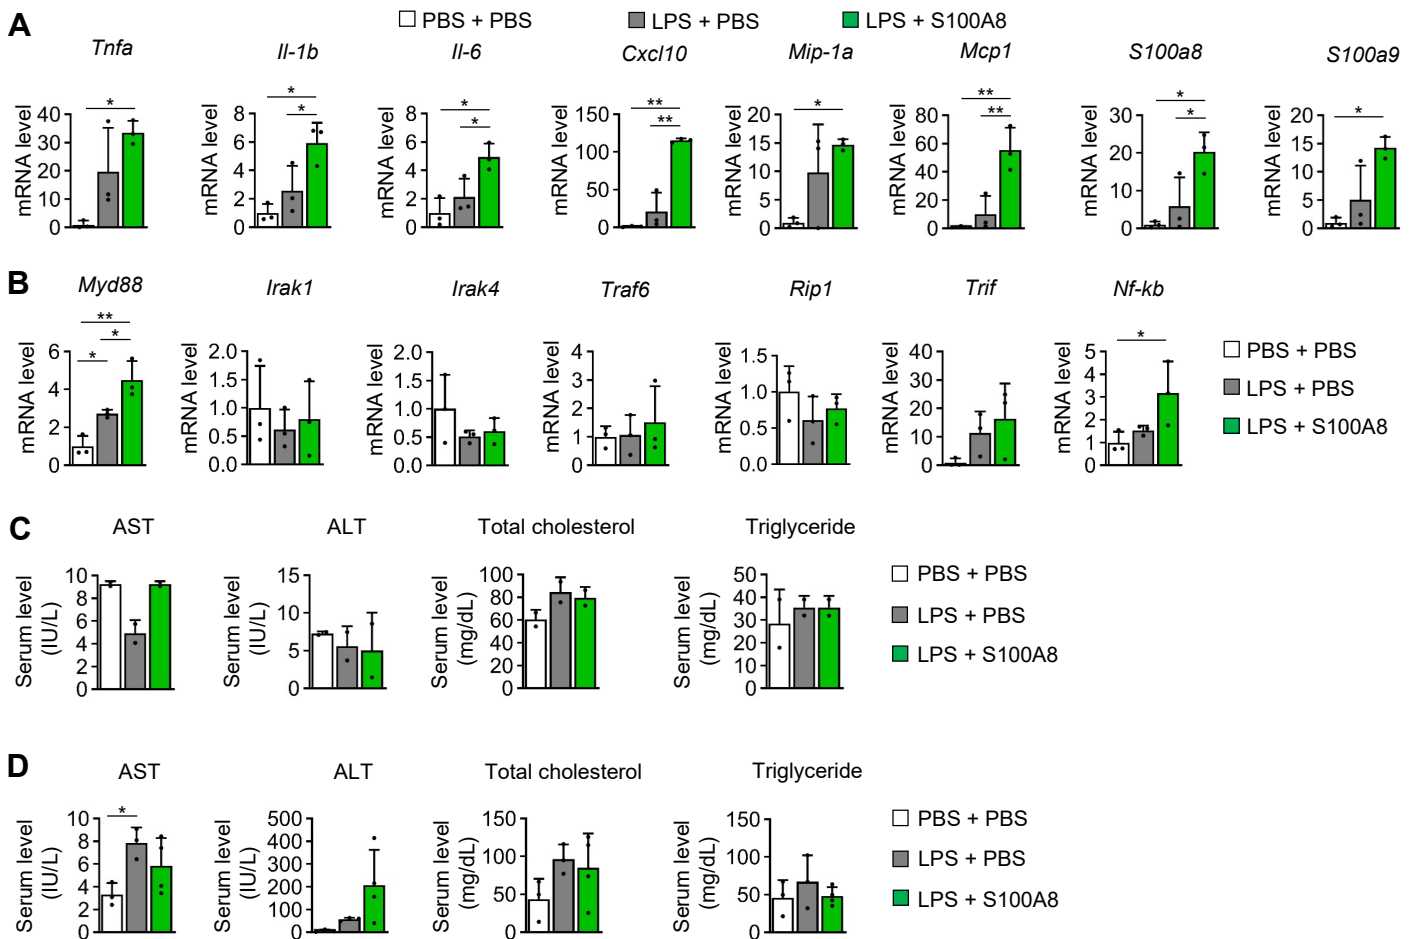

**Figure S5. S100A8 promotes the expression of inflammatory cytokines in the liver by activating the TLR4-MyD88 pathway during LPS-induced sepsis. Related to Figure 1.**

WT mice were intraperitoneally injected with either PBS or S100A8 (0.1  $\mu\text{g/gBW}$ ) at 1 hour after LPS (12.5  $\mu\text{g/gBW}$ ) stimulation.

(A) mRNA expression of the indicated inflammatory cytokine genes in the mouse liver at 4 hours after the first injection analyzed by quantitative PCR ( $n = 3$ ).

(B) mRNA expression of the indicated TLR4 signaling pathway-related genes in the mouse liver at 4 hours after the first injection analyzed by quantitative PCR ( $n = 3$ ).

(C and D) AST, ALT, total cholesterol and triglyceride levels in serum samples collected from mice at 4 hours (C) and 24 hours (D) after injection ( $N = 2$  at 4 hours and  $n = 3-4$  at 24 hours).

Data are represented as the mean  $\pm$  SEM. \* $p < 0.05$ , \*\* $p < 0.01$ .

## Figure S6

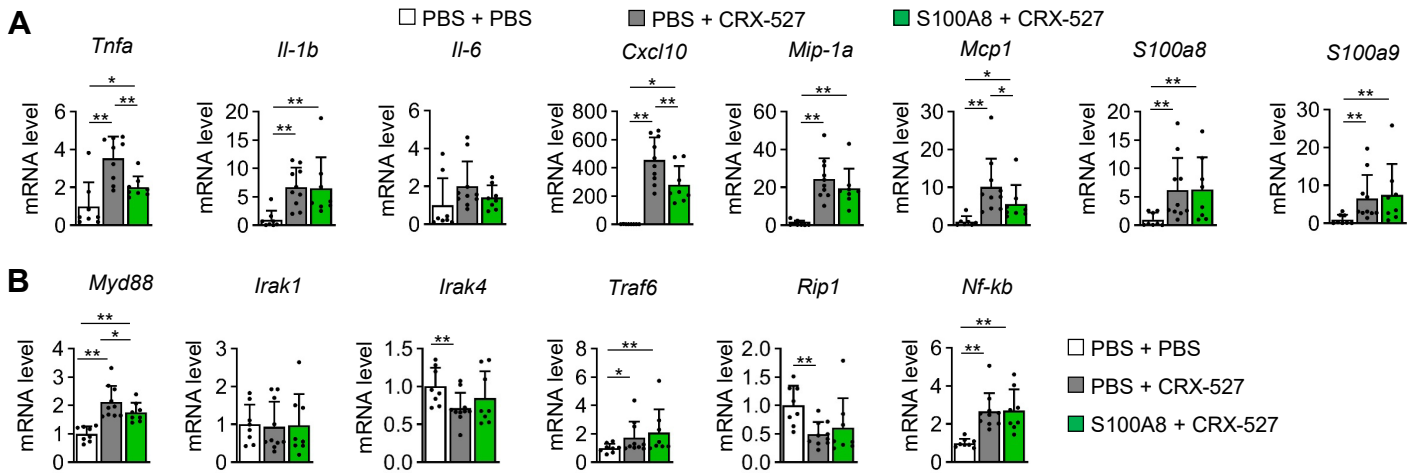

### Figure S6. Intraperitoneal injection of S100A8 attenuated the upregulation of inflammatory cytokines and *Myd88* gene expression induced by CRX-527. Related to Figure 1.

C57BL/6J mice were intraperitoneally injected with either PBS or S100A8 (0.1 µg/gBW) at 30 minutes before CRX-527 (0.5 µg/gBW) stimulation.

(A) mRNA expression of the indicated inflammatory cytokine genes in the mouse peritoneal cells at 2 hours after the first injection analyzed by quantitative PCR (n = 8-10).

(B) mRNA expression of the indicated TLR4 signaling pathway-related genes in the mouse peritoneal cells at 2 hours after the first injection analyzed by quantitative PCR (n = 8-10).

Data are represented as the mean ± SEM. \*p < 0.05, \*\*p < 0.01.

## Figure S7

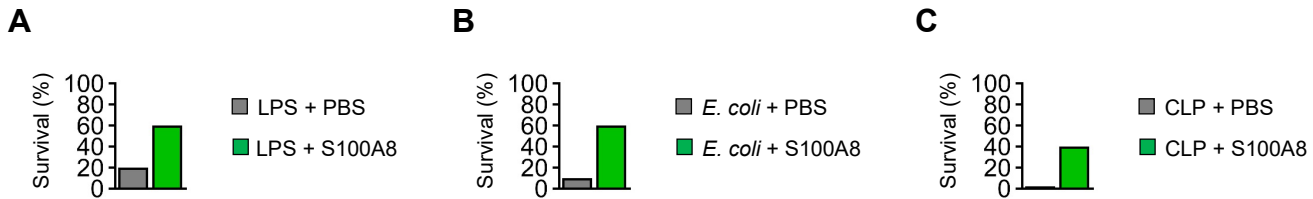

### Figure S7. S100A8 improves survival rates in mice of lethal endotoxemia and sepsis models.

#### Related to Figure 1.

Wild-type mice at 10 weeks of age were used for experiments.

(A) The survival rates of mice injected with either PBS or S100A8 (0.1  $\mu\text{g/gBW}$ ) at one hour after LPS (12.5  $\mu\text{g/gBW}$ ) stimulation at 72 hours after the first injection ( $n = 10$ ).

(B) The survival rates of mice injected with either PBS or S100A8 (0.1  $\mu\text{g/gBW}$ ) at one hour after *E. coli* DH5 $\alpha$  ( $2.0 \times 10^9$  CFU per mouse) injection were measured 72 hours later ( $n = 10$ ).

(C) The survival rates of mice injected with either PBS or S100A8 (0.1  $\mu\text{g/gBW}$ ) twice (at 0 hour and 24 hours) after cecal ligation and puncture (CLP) treatment were measured at 72 hours later ( $n = 10$ ).



**Figure S8**

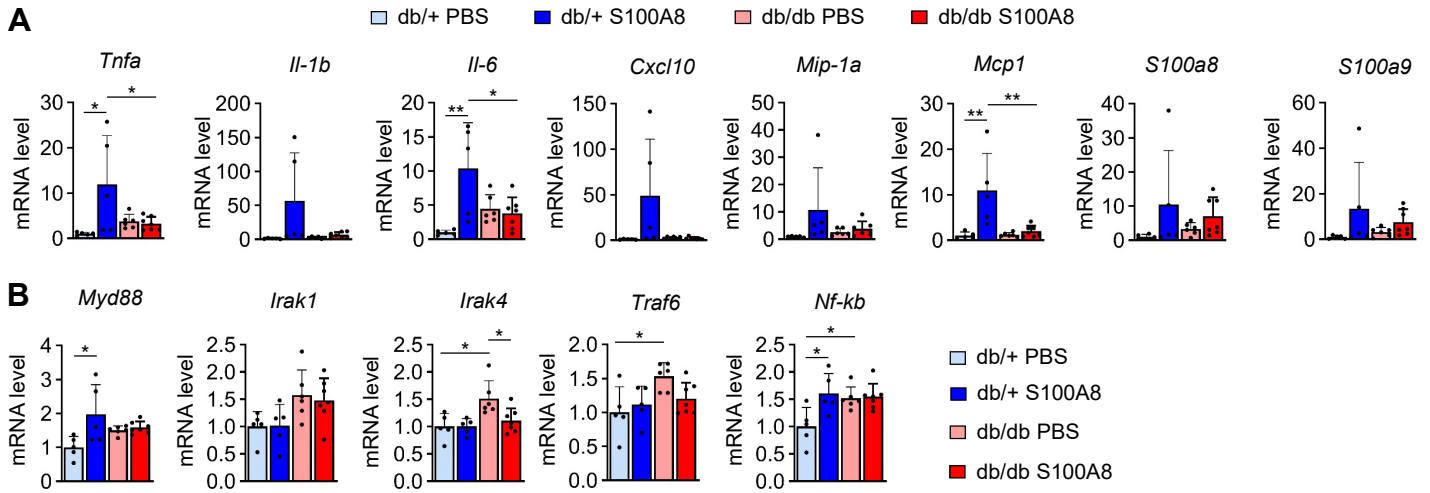

**Figure S8. S100A8 administration did not alter the expression of inflammatory cytokines and TLR4 signaling pathway-related genes in peritoneal cells from db/db mice. Related to Figure 3.** db/db and db/+ mice at 11 weeks of age were used for *in vivo* experiments. Mice were injected with PBS or S100A8 (0.1  $\mu$ g/gBW), and then peritoneal cells were analyzed by quantitative PCR at 4 hours after injection. (A) mRNA expression of the indicated inflammatory cytokine and S100 genes in peritoneal cells (n = 5-7). (B) mRNA expression of the indicated TLR4 signaling pathway-related genes in peritoneal cells (n = 5-7). Data are represented as the mean  $\pm$  SEM. \*p < 0.05, \*\*p < 0.01.

## Figure S9

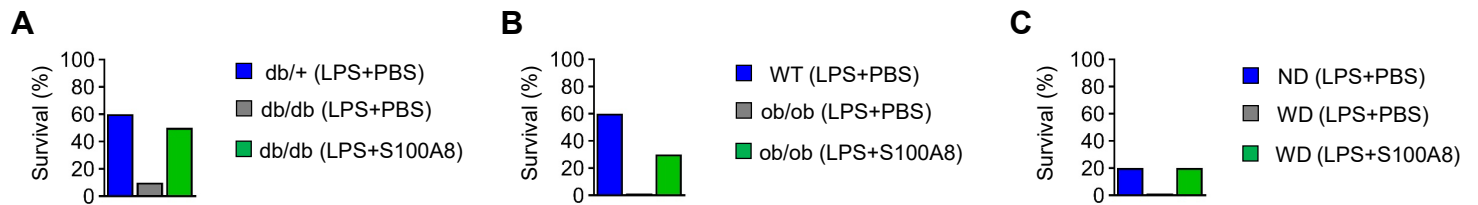

### Figure S9. S100A8 improves survival rates in lethal endotoxemia with mice models of diabetes and obesity. Related to Figure 4.

(A) The survival rates of db/db and db/+ mice at 8 weeks of age, injected with either PBS or S100A8 (0.1  $\mu\text{g/gBW}$ ) one hour after LPS (12.5  $\mu\text{g/gBW}$ ) stimulation were measured at 72 hours (n = 13).

(B) The survival rates of ob/ob and wild-type (WT) mice at 8 weeks of age, injected with either PBS or S100A8 (0.1  $\mu\text{g/gBW}$ ) one hour after LPS (12.5  $\mu\text{g/gBW}$ ) stimulation at 72 hours after the first injection (n = 10).

(C) The survival rates of C57BL/6J mice fed Western diet (WD) or normal diet (ND) from 8 to 16 weeks of age, injected with either PBS or S100A8 (0.1  $\mu\text{g/gBW}$ ) at one hour after LPS (12.5  $\mu\text{g/gBW}$ ) stimulation were measured at 72 hours (n = 10).

**Figure S10**

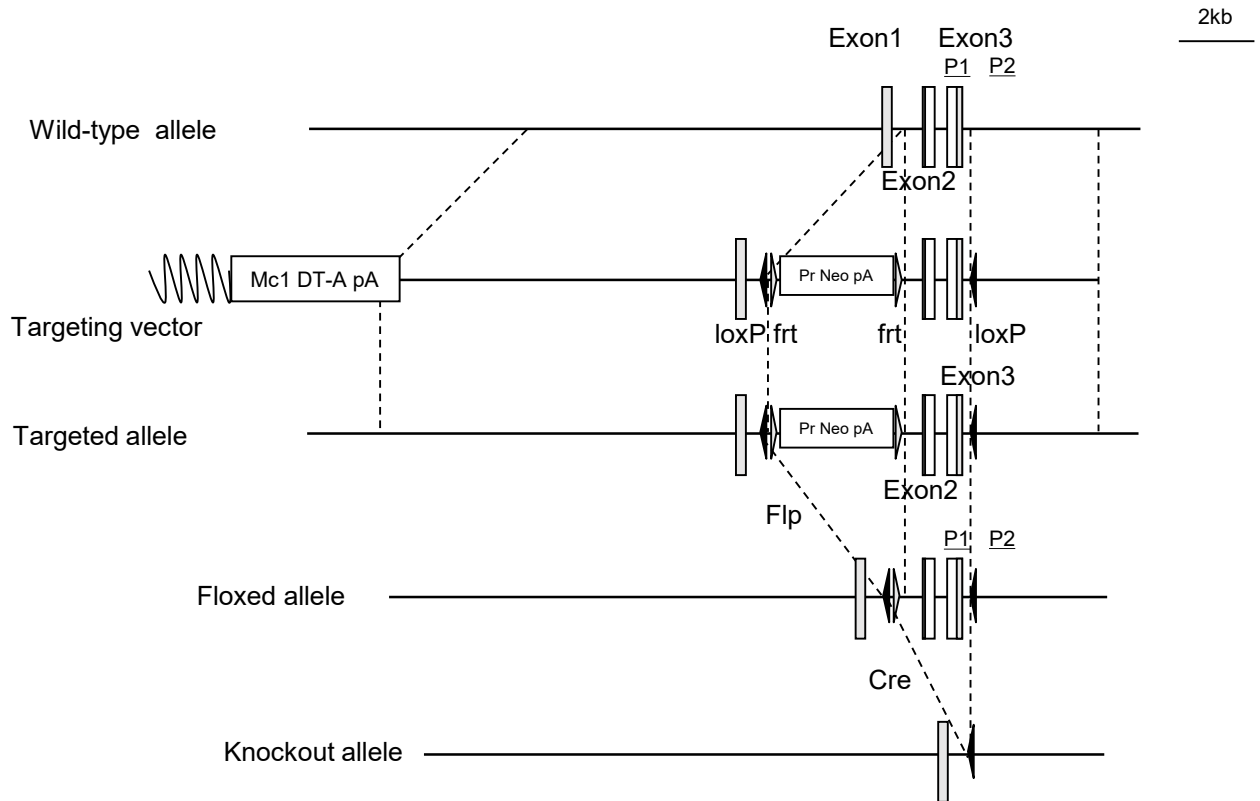

**Figure S10. Generation of myelomonocytic cell-specific S100A8 knockout mice. Related to Figure 5.**

Schemes show the construction of generalized myelomonocytic cell-specific S100A8 knockout mice. See the Methods for details.

## Figure S11

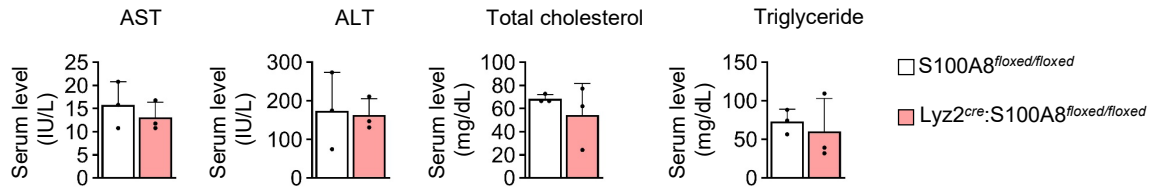

**Figure S11. LPS administration did not cause liver injury in myelomonocytic cell-specific S100A8 knockout mice. Related to Figure 5.**

Myelomonocytic cell-specific S100A8 knockout (Lyz2<sup>cre</sup>:S100A8<sup>floxed/floxed</sup>) mice or S100A8-floxed (S100A8<sup>floxed/floxed</sup>) mice at 10 weeks of age were used for experiments.

AST, ALT, total cholesterol and triglyceride levels in serum samples collected at 4 hours after PBS or LPS (12.5 µg/gBW) injection (n = 3).

## Figure S12

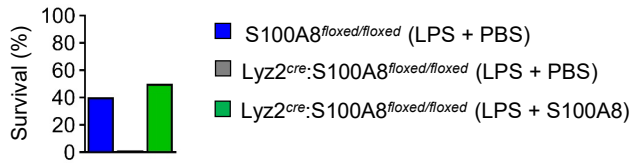

### Figure S12. S100A8 improves survival rates of endotoxemia in of myelomonocytic cell-specific S100A8 knockout mice. Related to Figure 5.

Myelomonocytic cell-specific S100A8 knockout (Lyz2<sup>cre</sup>:S100A8<sup>flxed/flxed</sup>) mice or S100A8<sup>flxed/flxed</sup> mice at 10 weeks of age were injected with either PBS or S100A8 (0.1 µg/gBW) one hour after LPS (12.5 µg/gBW) stimulation. The survival rates were measured at 72 hours (n = 5-8).

**Table S1. qPCR primer sequences, related to STAR Methods.**

| Gene (species)           | Primers |                          |
|--------------------------|---------|--------------------------|
| <i>Actb</i><br>(mouse)   | Forward | GGCTGTATTCCCCTCCATCG     |
|                          | Reverse | CCAGTTGGTAACAATGCCATGT   |
| <i>Tnfa</i><br>(mouse)   | Forward | CCCTCACACTCAGATCATCTTCT  |
|                          | Reverse | GCTACGACGTGGGCTACAG      |
| <i>Il-1b</i><br>(mouse)  | Forward | GGGCCTCAAAGGAAAGAATC     |
|                          | Reverse | TTGCTTGGGATCCCACTCT      |
| <i>Il-6</i><br>(mouse)   | Forward | TAGTCCTTCTACCCCAATTTCC   |
|                          | Reverse | TTGGTCCTTAGCCACTCCTTC    |
| <i>Cxcl10</i><br>(mouse) | Forward | TGCTGGGTCTGAGTGGGACT     |
|                          | Reverse | CCCTATGGCCCTCATTCTCAC    |
| <i>Mip-1a</i><br>(mouse) | Forward | CCCAGCCAGGTGTCATTTTCC    |
|                          | Reverse | GCATTCAGTTCCAGGTCAGTG    |
| <i>Mcp1</i><br>(mouse)   | Forward | AAAAACCTGGATCGGAACCAA    |
|                          | Reverse | CGGGTCAACTTCACATTCAAAG   |
| <i>S100a8</i><br>(mouse) | Forward | AAATCACCATGCCCTCTACAAG   |
|                          | Reverse | CCCCTTTTATCACCATCGCAA    |
| <i>S100a9</i><br>(mouse) | Forward | ATACTCTAGGAAGGAAGGACACC  |
|                          | Reverse | TCCATGATGTCATTTATGAGGGC  |
| <i>Myd88</i><br>(mouse)  | Forward | CGATTATCTACAGAGCAAGGAATG |
|                          | Reverse | ATAGTGATGAACCGCAGGATAC   |
| <i>Irak1</i><br>(mouse)  | Forward | TTCCACTCCCTGTTTCCCTC     |
|                          | Reverse | AACCACCCTCTCCAATCCTG     |
| <i>Irak4</i><br>(mouse)  | Forward | CATCGTGGCGGTGAAGAAG      |
|                          | Reverse | AGCATACACTAAGCACAGGTTG   |
| <i>Traf6</i><br>(mouse)  | Forward | TTGGAGAGTCGCCTAGTAAG     |
|                          | Reverse | GTTACACTGCTGTGCTTCC      |
| <i>Rip1</i><br>(mouse)   | Forward | CCTTCTTGCCAGGAGAATGA     |
|                          | Reverse | CTCTGAGGCGATCTGACGAC     |
| <i>Trif</i><br>(mouse)   | Forward | ACCTCCTGCATGCCATGGTTCT   |
|                          | Reverse | TCAGCCAGCAGGTGGTACAA     |
| <i>Nf-kb</i><br>(mouse)  | Forward | ATTCTGACCTTGCCTATCTAC    |
|                          | Reverse | TCCAGTCTCCGAGTGAAG       |
